# Supplementary material for: GDF15 negatively regulates RGS16 involving in abnormal lipid metabolism in IVF-ET male mice offspring
Source: Research Square preprint supplement (doi:10.21203/rs.3.rs-1565536/v1), 2022-04-27
Supplement: Supplementary file 1 [file 7167320de135d7fbb38e8b94.docx]

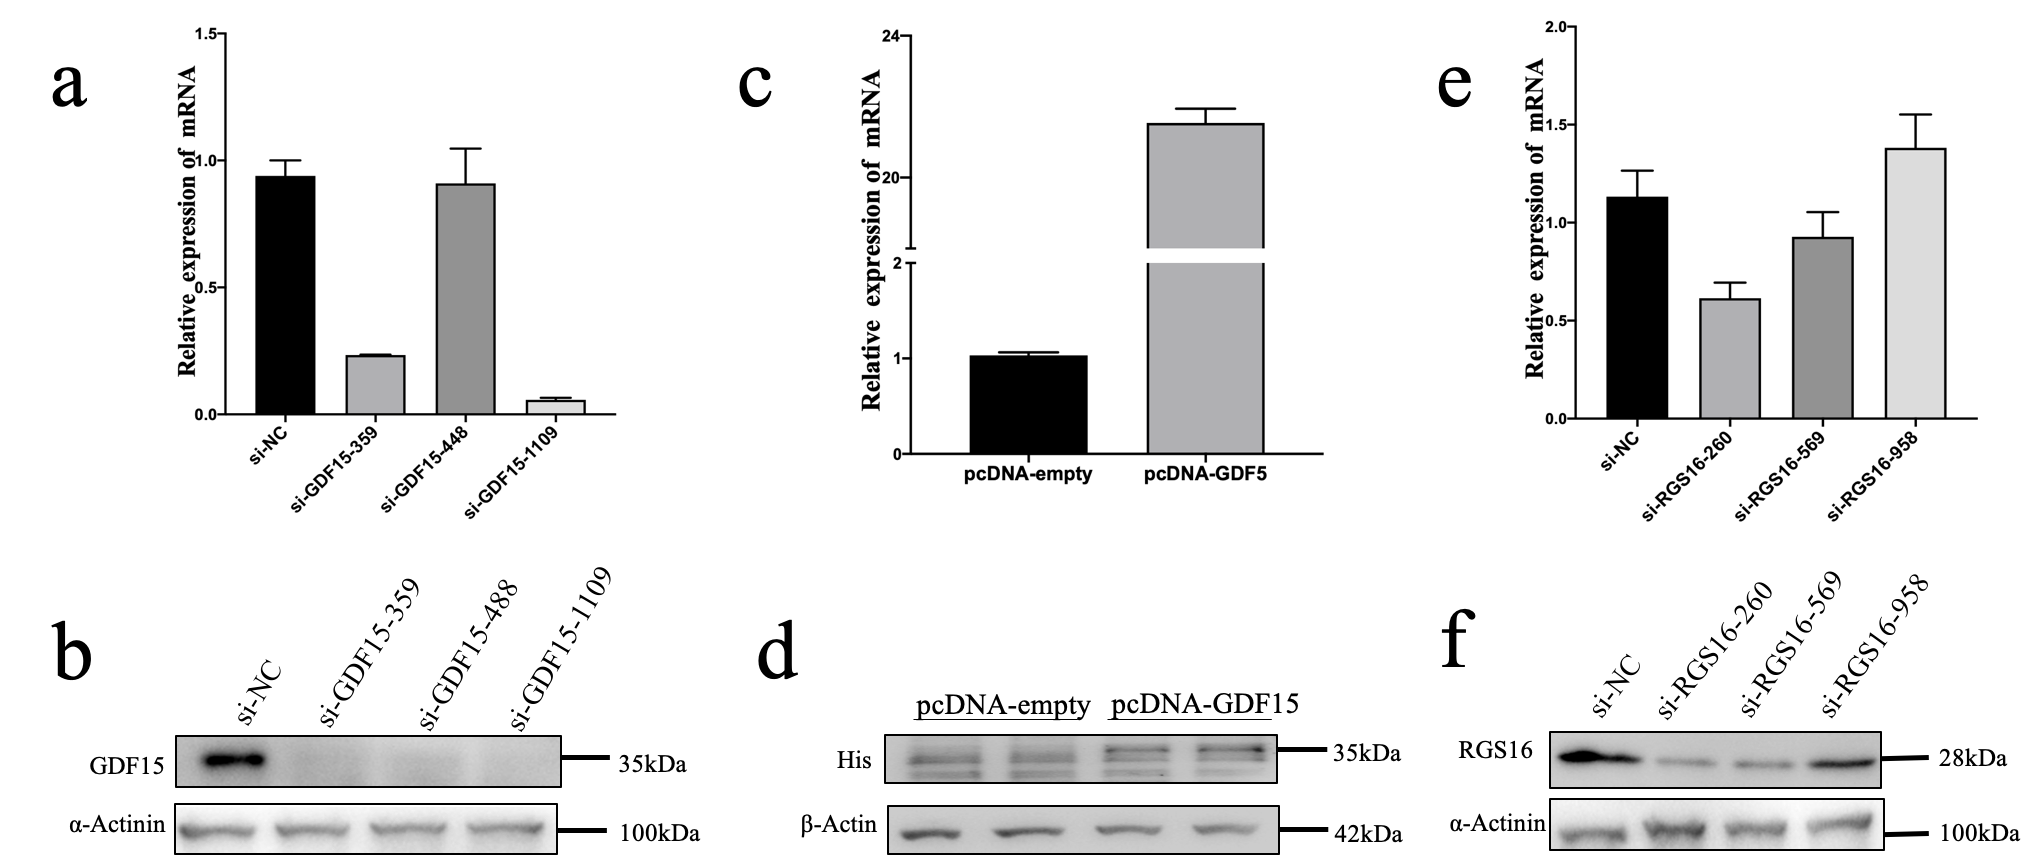


**Supplementary Figure 2 (related to figures 6, 7).** Transfection in HepG2 cells was assessed by qPCR or Western blot. **a-b.** GDF15 knockdown (KD) in HepG2 cells evaluated by qPCR or Western blot. **c-d.** GDF15 overexpression in HepG2 cells evaluated by qPCR or Western blot. **e-f.** RGS16 knockdown (KD) in HepG2 cells evaluated by qPCR or Western blot.
